# Supplementary material
Source: publisher figshare collection journal article supplement (https://acs.figshare.com/ndownloader/files/4287352)
Supplement: Supplementary file 1 [file 4287352]

## Supplemental Information

### Syntheses of 5-Formyl- and 5-Carboxyl-dC Containing DNA Oligos as Potential Oxidation Products of 5-Hydroxymethylcytosine in DNA

Qing Dai\*, Chuan He

*Department of Chemistry and Institute for Biophysical Dynamics, The University of  
Chicago, 929 E. 57<sup>th</sup> St., Chicago, Illinois, 60637 USA*

*daiqing@uchicago.edu*

#### Table of Contents

|                                                                                 |           |
|---------------------------------------------------------------------------------|-----------|
| 1. Experimental procedure for compounds <b>2-9</b> , <b>III</b> and <b>V</b>    | Page S2-7 |
| 2. DNA synthesis, deprotection, purification and characterization               | Page S8   |
| 3. <sup>1</sup> H NMR and <sup>13</sup> C NMR spectra of <b>2</b>               | Page S9   |
| 4. <sup>1</sup> H NMR and <sup>13</sup> C NMR spectra of <b>3</b>               | Page S10  |
| 5. <sup>1</sup> H NMR and <sup>13</sup> C NMR spectra of <b>4</b>               | Page S11  |
| 6. <sup>1</sup> H NMR and <sup>13</sup> C NMR spectra of <b>5</b>               | Page S12  |
| 7. <sup>1</sup> H NMR and <sup>13</sup> C NMR spectra of <b>6</b>               | Page S13  |
| 8. <sup>1</sup> H a NMR and <sup>13</sup> C NMR spectra of <b>III</b>           | Page S14  |
| 9. <sup>31</sup> P NMR of <b>III</b> and <sup>1</sup> H NMR spectra of <b>7</b> | Page S15  |
| 10. <sup>13</sup> C NMR of <b>7</b> and <sup>1</sup> H NMR spectra of <b>8</b>  | Page S16  |
| 11. <sup>13</sup> C NMR of <b>8</b> and <sup>1</sup> H NMR spectra of <b>9</b>  | Page S17  |
| 12. <sup>13</sup> C NMR of <b>9</b> and <sup>1</sup> H NMR spectra of <b>V</b>  | Page S18  |
| 13. <sup>13</sup> C NMR and <sup>31</sup> P NMR spectra of <b>V</b>             | Page S19  |

### **3',5'-O-Di-*tert*-butylsilyl-5-iodo-2'-deoxycytidine (2)**

To a cloudy solution of **1** (690 mg, 1.95 mmol) in DMF (15 mL) at 0 °C was added di-*tert*-butylsilyl-bis(trifluoromethanesulfonate) (0.81 mL, 1.1 equiv). After stirring at 0 °C for 10 min, ice-water bath was removed to allow the temperature going back to rt. imidazole (332 mg, 2.5 equiv) was then added and the mixture was stirred at rt for 0.5 h. After removal of DMF under high vacuum, the residue was dissolved in ethyl acetate, washed with water, 5% NaHCO<sub>3</sub> solution and brine, and dried over Na<sub>2</sub>SO<sub>4</sub>. After evaporation of the solvent under reduced pressure, the residue was purified by silica gel chromatography, eluting with 3-6% MeOH in CH<sub>2</sub>Cl<sub>2</sub>, to give **2** (913 mg, 95%) as white foam. <sup>1</sup>H NMR (500.1 MHz) (CDCl<sub>3</sub>) δ: 8.86 (br., 1H), 7.67 (s, 1H), 6.08 (m, *J*=5.0 Hz, 1H), 5.72 (br., 1H), 4.49 (m, 1H), 3.99-4.10 (m, 2H), 3.74 (m, 1H), 2.37 (m, 2H), 1.07 (s, 9H), 0.99 (s, 9H). <sup>13</sup>C NMR (125.8 MHz) (CDCl<sub>3</sub>) δ: 164.8, 155.3, 146.9, 86.4, 79.2, 75.3, 68.4, 57.6, 40.4, 28.4, 28.1, 23.6, 21.1. HRMS calculated for C<sub>17</sub>H<sub>29</sub>IN<sub>3</sub>O<sub>4</sub>Si, [MH<sup>+</sup>] 494.0972 (calcd.), 494.0967 (found).

### **3',5'-O-Di-*t*-butylsilyl-5-formyl-2'-deoxycytidine (3)**

To a solution of **2** (897 mg, 1.82 mmol) in anhydrous THF (50 mL) in a flask with a self-contained glass coupling apparatus equipped with a pressure equalizing addition funnel were added Ph<sub>3</sub>P (286 mg, 0.6 equiv) and Pd<sub>2</sub>(dba)<sub>3</sub> (166 mg, 0.10 equiv). The apparatus was charged with 50 psi of CO and heated to 70 °C and Bu<sub>3</sub>SnH (0.53 mL, 1.05 equiv) was added slowly with a syringe within 1 h. After that, the mixture was kept on stirring for 2 h at 70 °C. After cooled to rt, the small amount of solid was removed by filtration. The solvent of filtrate was removed under reduced pressure and the residue was purified

by silica gel chromatography, eluting with 2-5% MeOH in CH<sub>2</sub>Cl<sub>2</sub>, to give **3** (563 mg, 78%) as white foam. IR (CH<sub>2</sub>Cl<sub>2</sub>)  $\nu_{(C=O)}$  of CHO=1665.2 cm<sup>-1</sup>. <sup>1</sup>H NMR (500.1 MHz) (CDCl<sub>3</sub>)  $\delta$ : 9.48 (s, 1H), 8.18 (br., 1H), 8.06 (s, 1H), 7.50 (br., 1H), 6.08 (m, 1H), 4.51 (m, 1H), 4.03 (m, 2H), 3.81 (m, 1H), 2.46 (m, 2H), 1.05 (s, 9H), 0.97 (s, 9H). <sup>13</sup>C NMR (125.8 MHz) (CDCl<sub>3</sub>)  $\delta$ : 188.1, 163.7, 153.9, 152.9, 106.2, 87.2, 79.4, 75.1, 68.3, 40.4, 23.6, 21.1. HRMS calculated for C<sub>18</sub>H<sub>29</sub>N<sub>2</sub>O<sub>6</sub>Si, [MH<sup>+</sup>] 397.1795 (calcd.), 397.1789 (found).

#### **3',5'-O-Di-*t*-butylsilyl-*N*<sup>4</sup>-acetyl-5-formyl-2'-deoxycytidine (4)**

To a solution of **3** (521 mg, 1.32 mmol) in anhydrous DMF (8 mL) in a flask was added acetic anhydride (0.15 mL, 1.2 equiv) and the mixture was stirred overnight at rt. MeOH (0.5 mL) was added to quench the reaction. After the mixture was stirred for additional 15min, the solvents were removed under reduced pressure. The residue was purified by silica gel chromatography, eluting with 2-4% MeOH in CH<sub>2</sub>Cl<sub>2</sub>, to give **4** (520 mg, 90%) as white foam. IR (CH<sub>2</sub>Cl<sub>2</sub>)  $\nu_{(C=O)}$  of CHO=1664.6 cm<sup>-1</sup>. <sup>1</sup>H NMR (500.1 MHz) (CDCl<sub>3</sub>)  $\delta$ : 10.70 (br., 1H), 9.52 (s, 1H), 8.31 (s, 1H), 6.08 (m, 1H), 4.54 (m, 1H), 4.06 (m, 2H), 3.86 (m, 1H), 2.52 (m, 2H), 1.04 (s, 9H), 1.00 (s, 9H). <sup>13</sup>C NMR (125.8 MHz) (CDCl<sub>3</sub>)  $\delta$ : 188.2, 172.5, 159.9, 154.2, 153.1, 106.1, 87.7, 79.7, 74.9, 68.2, 40.2, 23.6, 21.1. HRMS calculated for C<sub>20</sub>H<sub>32</sub>N<sub>3</sub>O<sub>6</sub>Si, [MH<sup>+</sup>] 438.2060 (calcd.), 438.2055 (found).

#### ***N*<sup>4</sup>-Acetyl-5-formyl-2'-deoxycytidine (5)**

To a solution of **4** (500 mg, 1.14 mmol) in THF (20 mL) were added HF in pyridine (1.0 equiv) under argon and the mixture was stirred at rt for 1 h. Silica gel (4.0 g) was added and the solvent was removed under reduced pressure. The residue was purified by silica

gel chromatography, eluting with 8-12% MeOH in CH<sub>2</sub>Cl<sub>2</sub>, to give **5** (319 mg, 94%) as white foam. IR (CH<sub>2</sub>Cl<sub>2</sub>)  $\nu_{(C=O)}$  of CHO=1666.5 cm<sup>-1</sup>. <sup>1</sup>H NMR (500.1 MHz) (CDCl<sub>3</sub>)  $\delta$ : 9.25 (s, 1H), 9.05 (s, 1H), 5.90 (m, 1H), 4.12 (m, 1H), 3.79 (m, 1H), 3.69 (dd,  $J=12.5, 2.5$  Hz, 1H), 3.52 (dd,  $J=12.0, 2.5$  Hz, 1H), 2.35 (m, 1H), 2.31 (s, 3H), 2.00 (m, 1H). <sup>13</sup>C NMR (125.8 MHz) (CDCl<sub>3</sub>)  $\delta$ : 193.4, 177.0, 163.9, 160.3, 158.4, 110.3, 93.0, 92.9, 73.8, 65.2, 46.5, 31.4. HRMS calculated for C<sub>12</sub>H<sub>16</sub>N<sub>3</sub>O<sub>6</sub>, [MH<sup>+</sup>] 298.1039 (calcd.), 298.1034 (found).

**5'-O-(4,4'-Dimethoxytrityl)-N<sup>4</sup>-acetyl-5-formyl-2'-deoxycytidine (6)**

To a solution of **5** (237 mg, 0.80 mmol) in pyridine (8 mL) was added DMTr-Cl (324 mg, 1.2 equiv) under argon. The mixture was stirred overnight at rt. MeOH (1 mL) was added to quench the reaction. After concentrated to dryness, the residue was dissolved in CH<sub>2</sub>Cl<sub>2</sub> (100 mL) and the mixture was washed with 5% NaHCO<sub>3</sub> and brine, dried over Na<sub>2</sub>SO<sub>4</sub> and concentrated to dryness. The residue was purified by silica gel chromatography, eluting with 1-3% MeOH in CH<sub>2</sub>Cl<sub>2</sub>, to give **6** (437 mg, 91%) as white foam. IR (CH<sub>2</sub>Cl<sub>2</sub>)  $\nu_{(C=O)}$  of CHO=1663.4 cm<sup>-1</sup>. <sup>1</sup>H NMR (500 MHz) (CD<sub>3</sub>CN)  $\delta$ : 10.68 (br., 1H), 8.72 (s, 1H), 8.52 (s, 1H), 7.44 (m, 2H), 7.27-7.35 (m, 7H), 6.88 (m, 4H), 6.06 (m, 1H), 4.55 (m, 1H), 4.08 (m, 1H), 3.78 (s, 6H), 3.42 (m, 1H), 3.36 (m, 1H), 2.55 (m, 1H), 2.50 (s, 3H), 2.44 (m, 1H). <sup>13</sup>C NMR (125.8 MHz) (CD<sub>3</sub>CN)  $\delta$ : 189.4, 171.9, 160.0, 159.9, 159.8, 155.9, 153.5, 145.5, 136.7, 136.4, 131.1, 131.0, 129.1, 129.0, 128.1, 114.2, 105.6, 88.8, 87.6, 87.4, 70.2, 63.3, 55.9, 41.9, 27.1. HRMS calculated for C<sub>33</sub>H<sub>34</sub>N<sub>3</sub>O<sub>8</sub>, [MH<sup>+</sup>] 600.2346 (calcd.), 600.2340 (found).

**5'-O-(4,4'-Dimethoxytrityl)-N<sup>4</sup>-Acetyl-5-formyl-2'-deoxycytidine 3'-O-(2-cyanoethyl-N,N-diisopropyl)phosphoramidite (III)**

To a stirring solution of **6** (120 mg, 0.20 mmol) in CH<sub>2</sub>Cl<sub>2</sub> (8 mL) were added *N,N*-diisopropylethylamine (0.24 mL) under argon followed by 2-cyanoethyl *N,N*-diisopropylchlorophosphoramidite (71.7 mg, 0.30 mmol). After the reaction mixture was stirred at room temperature for 0.5 h, CH<sub>2</sub>Cl<sub>2</sub> (80 mL) was added. The mixture was washed with 5% aqueous NaHCO<sub>3</sub> and brine, dried over Na<sub>2</sub>SO<sub>4</sub> and concentrated to dryness. The residue was purified by silica gel chromatography, eluting with 6-9% acetone in CH<sub>2</sub>Cl<sub>2</sub> containing 0.2% Et<sub>3</sub>N, to give **III** (141 mg, 88%) as white foam. IR (CH<sub>2</sub>Cl<sub>2</sub>)  $\nu_{(C=O)}$  of CHO=1664.8 cm<sup>-1</sup>. <sup>1</sup>H NMR (500.1 MHz) (CD<sub>3</sub>CN)  $\delta$ : 10.66 (br., 1H), 8.74 (s, 0.5H), 8.47 (s, 0.5H), 8.43 (s, 1H), 7.43 (m, 2H), 7.27-7.34 (m, 7H), 6.88 (m, 4H), 6.08 (m, 1H), 4.71 (m, 1H), 4.18 (m, 1H), 3.74 (s, 6H), 3.70 (m, 4H), 3.42 (m, 2H), 2.67 (m, 1H), 2.55 (m, 1H), 2.50 (s, 3H). 1.06-1.20 (m, 12H). <sup>13</sup>C NMR (125.8 MHz) (CD<sub>3</sub>CN)  $\delta$ : 189.4, 171.9, 160.0, 159.9, 159.8, 155.8, 145.4, 145.3, 136.4, 136.3, 131.1, 129.2, 129.1, 129.0, 128.2, 114.2, 105.8, 88.8, 88.7, 87.7, 86.7, 86.4, 62.962.7, 59.3, 55.9, 44.1, 44.0, 41.2, 40.8, 27.1. 24.9, 24.8, 21.0. <sup>31</sup>P NMR (202.5 MHz) (CD<sub>3</sub>CN) 148.47, 148.35 ppm. HRMS calcd. for C<sub>42</sub>H<sub>51</sub>N<sub>5</sub>O<sub>9</sub>P, [MH]<sup>+</sup> 800.3424 (calcd.), 800.3419 (found).

### 5-Methoxycarbonyl-2'-deoxycytidine (**7**)

To a solution of **1** (540 mg, 1.53 mmol) in DMF (20 mL) were added Ph<sub>3</sub>P (242 mg, 0.92 mmol, 0.6 equiv), Et<sub>3</sub>N (377  $\mu$ L, 2.0 equiv.) and Pd<sub>2</sub>(dpa)<sub>3</sub> (140 mg, 0.1 eq.) and MeOH (1 mL). The mixture was stirred at 50 °C under CO atmosphere overnight. After cooling to rt, the solid was removed by filtration. The filtrate was evaporated under reduced pressure. The residue was purified by silica gel chromatography, eluting with 5-15% MeOH in CH<sub>2</sub>Cl<sub>2</sub>, to give **7** (406 mg, 93%) as white solid. IR (MeOH)  $\nu_{(C=O)}$  of CO<sub>2</sub>Me

=1644.1  $\text{cm}^{-1}$ .  $^1\text{H}$  NMR (500.1 MHz) ( $\text{DMSO}-d_6$ )  $\delta$ : 8.96 (s, 1H), 7.96 (br., 1H), 7.64 (br., 1H), 6.07 (t,  $J=6.5$  Hz, 1H), 5.24 (d,  $J=4.5$  Hz, 1H), 5.08 (t,  $J=4.5$  Hz, 1H), 4.21 (m, 1H), 3.85 (s, 1H), 3.74 (s, 3H), 3.63 (m, 1H), 3.58 (m, 1H), 2.26 (m, 1H), 2.04 (m, 1H).  $^{13}\text{C}$  NMR (125.8 MHz) ( $\text{DMSO}-d_6$ )  $\delta$ : 166.6, 164.4, 154.7, 150.1, 95.9, 89.1, 87.6, 71.1, 62.0, 53.2, 42.7. HRMS calculated for  $\text{C}_{11}\text{H}_{16}\text{N}_3\text{O}_6\text{S}$  [ $\text{MH}^+$ ] 286.1039 (calcd.), 286.1034 (found).

### **5-Methoxycarbonyl- $N^4$ -acetyl-2'-deoxycytidine (8)**

To a solution of **7** (200 mg, 0.70 mmol) in DMF (8 mL) was added  $\text{Ac}_2\text{O}$  (79  $\mu\text{L}$ , 1.2 equiv) and the mixture was stirred overnight. MeOH (100  $\mu\text{L}$ ) was added to quench the reaction. The solvents were removed under reduced pressure and the residue 10-14% MeOH in  $\text{CH}_2\text{Cl}_2$ , to give **8** (202 mg, 88%) as white solid. IR (MeOH)  $\nu_{(\text{C}=\text{O})}$  of  $\text{CO}_2\text{Me}$ =1642.5  $\text{cm}^{-1}$ .  $^1\text{H}$  NMR (500 MHz) ( $\text{DMSO}-d_6$ )  $\delta$ : 10.62 (br., 1H), 9.23 (s, 1H), 6.03 (t,  $J=6.0$  Hz, 1H), 5.28 (d,  $J=4.5$  Hz, 1H), 5.17 (t,  $J=4.5$  Hz, 1H), 4.24 (m, 1H), 3.90 (s, 1H), 3.78 (s, 3H), 3.68 (m, 1H), 3.61 (m, 1H), 2.41 (s, 3H), 2.35 (m, 1H), 2.14 (m, 1H).  $^{13}\text{C}$  NMR (125.8 MHz) ( $\text{DMSO}-d_6$ )  $\delta$ : 172.2, 166.5, 160.4, 154.1, 151.3, 98.0, 89.4, 88.6, 70.5, 61.5, 53.8, 42.5, 27.5. HRMS calculated for  $\text{C}_{13}\text{H}_{17}\text{N}_3\text{O}_7$ , [ $\text{MH}^+$ ] 328.1145 (calcd.), 328.1139 (found).

### **5'-O-(4,4'-Dimethoxytrityl)- 5-methoxycarbonyl- $N^4$ -acetyl-2'-deoxycytidine (9)**

To a stirring solution of **8** (120 mg, 0.37 mmol) in pyridine (8 mL) was added DMTr-Cl (149 mg, 1.2 equiv) under argon. The mixture was stirred overnight at rt. MeOH (1 mL) was added to quench the reaction. After concentrated to dryness, the residue was dissolved in  $\text{CH}_2\text{Cl}_2$  (100 mL) and the mixture was washed with 5%  $\text{NaHCO}_3$  and brine,

dried over Na<sub>2</sub>SO<sub>4</sub> and concentrated to dryness. The residue was purified by silica gel chromatography, eluting with 1-3% MeOH in CH<sub>2</sub>Cl<sub>2</sub>, to give **9** (196 mg, 85%) as white foam. IR (CH<sub>2</sub>Cl<sub>2</sub>)  $\nu_{(C=O)}$  of CO<sub>2</sub>Me=1640.4 cm<sup>-1</sup>. <sup>1</sup>H NMR (500.1 MHz) (CD<sub>3</sub>CN)  $\delta$ : 10.71 (br., 1H), 8.92 (s, 1H), 7.46 (m, 2H), 7.24-7.34 (m, 7H), 6.86 (m, 4H), 6.05 (m, 1H), 4.36 (m, 1H), 4.06 (m, 1H), 3.75 (s, 6H), 3.58 (m, 1H), 3.42 (m, 1H), 3.24 (m, 1H), 3.18 (s, 3H), 2.50 (m, 4H), 2.35 (m, 1H). <sup>13</sup>C NMR (125.8 MHz) (CD<sub>3</sub>CN)  $\delta$ : 171.9, 166.4, 160.6, 159.7, 159.71, 154.1, 150.0, 145.8, 136.8, 131.0, 129.0, 128.8, 127.9, 114.0, 97.0, 88.8, 87.7, 87.3, 71.0, 63.6, 55.9, 52.7, 41.2, 27.1. (CD<sub>3</sub>CN)  $\delta$ : HRMS calculated for C<sub>34</sub>H<sub>36</sub>N<sub>3</sub>O<sub>9</sub>, [MH<sup>+</sup>] 630.2452 (calcd.), 630.2446 (found).

**5'-O-(4,4'-Dimethoxytrityl)-5-methoxycarbonyl-N<sup>4</sup>-acetyl-2'-deoxycytidine (9)  
3'-O-(2-cyanoethyl-N,N-diisopropyl)phosphoramidite (V)**

To a stirring solution of **9** (118 mg, 0.19 mmol) in CH<sub>2</sub>Cl<sub>2</sub> (8 mL) were added *N,N*-diisopropylethylamine (0.22 mL) under argon followed by 2-cyanoethyl *N,N*-diisopropylchlorophosphoramidite (68 mg, 0.28 mmol). After the reaction mixture was stirred at room temperature for 0.5 h, CH<sub>2</sub>Cl<sub>2</sub> (80 mL) was added. The mixture was washed with 5% aqueous NaHCO<sub>3</sub> and brine, dried over Na<sub>2</sub>SO<sub>4</sub> and concentrated to dryness. The residue was purified by silica gel chromatography, eluting with 6-9% acetone in CH<sub>2</sub>Cl<sub>2</sub> containing 0.2% Et<sub>3</sub>N, to give **V** (127 mg, 82%) as white foam. IR (CH<sub>2</sub>Cl<sub>2</sub>)  $\nu_{(C=O)}$  of CO<sub>2</sub>Me =1641.8 cm<sup>-1</sup>. <sup>1</sup>H NMR (500.1 MHz) (CD<sub>3</sub>CN)  $\delta$ : 10.76 (br., 1H), 8.99 (s, 0.5H), 8.96 (s, 0.5H), 7.46 (m, 2H), 7.22-7.36 (m, 7H), 6.86 (m, 4H), 6.10 (m, 1H), 4.56 (m, 1H), 4.18 (m, 1H), 3.78 (s, 6H), 3.60 (m, 4H), 3.24 (m, 1H), 3.10 (s, 1.5H), 3.07 (s, 1.5H), 2.65 (m, 2H), 2.50 (s, 3H), 2.45 (m, 1H), 1.01-1.16 (m, 12H). <sup>13</sup>C NMR (125.8 MHz) (CD<sub>3</sub>CN)  $\delta$ : 171.9, 167.2, 161.0, 159.8, 154.6, 150.4, 145.7, 136.7,

136.6, 131.1 131.0, 129.1, 129.0, 128.8, 128.0, 127.9, 114.0, 98.1, 88.7, 87.6, 87.4, 73.2, 72.1, 62.8, 62.6, 59.5, 55.9, 52.6, 44.0, 41.8 41.2, 27.0, 24.9, 24.8, 24.7, 21.0, 20.9.  $^{31}\text{P}$  NMR (202.5 MHz) ( $\text{CD}_3\text{CN}$ ) 148.32, 148.06 ppm. HMRS calculated for  $\text{C}_{43}\text{H}_{53}\text{N}_5\text{O}_{10}\text{P}$ ,  $[\text{MH}^+]$  830.3530 (calcd.), 830.3525 (found).

### **DNA synthesis, deprotection, purification and characterization**

Oligonucleotide synthesis was performed on an Expedite Nucleic Acid Synthesis System using standard DNA synthesis conditions (scale: 1  $\mu\text{M}$ ) except that the modified modifications **III** and **V** used double coupling to ensure good yields. Phosphoramidites for dA, dC, dG, dT and CPG carriers were obtained from *Glen Research*. The terminal DMTr protecting group was removed from the oligonucleotides by using the DMTr off mode. Then the resin containing oligos was transferred to a 2 mL vial. In general, two mild conditions were used for deprotection and cleavage of the **ODNs** from the resin with the oligos containing 5-fC and 5-hmC modifications. (1) The resin was treated with 1 mL 0.1 M  $\text{K}_2\text{CO}_3$  in MeOH/ $\text{H}_2\text{O}$  (v/v, 1:1) for 2-4 h at r.t. ; (2) the resin was treated with 1 mL concentrated ammonium hydroxide for 4 h at r.t. For oligos containing 5-caC modification) the resin was treated with 1 mL 0.1 M  $\text{K}_2\text{CO}_3$  in MeOH/ $\text{H}_2\text{O}$  (v/v, 1:1) overnight at 40 °C. After deprotection, filtration to get rid of the resin and the resin was rinsed with 0.5 mL the mixture of acetonitrile and water (v/v, 1:1). For the ammonium treatment, the filtrate was concentrated by speedvac. For the  $\text{K}_2\text{CO}_3$  treatment, the filtrate was added AcOH to pH neutral and then was concentrated by speedvac. The dried **ODN** samples were then dissolved in deionized water (1mL) and were purified by C18 reverse phase HPLC with the applied buffer as 0-20% acetonitrile in 0.1 M triethylammoniumacetate in water. The fractions were checked for purity by analytical HPLC and MALDI-MS. The purified oligonucleotides were concentrated by speedvac.



The oligonucleotides were purified per preparative HPLC as described above.

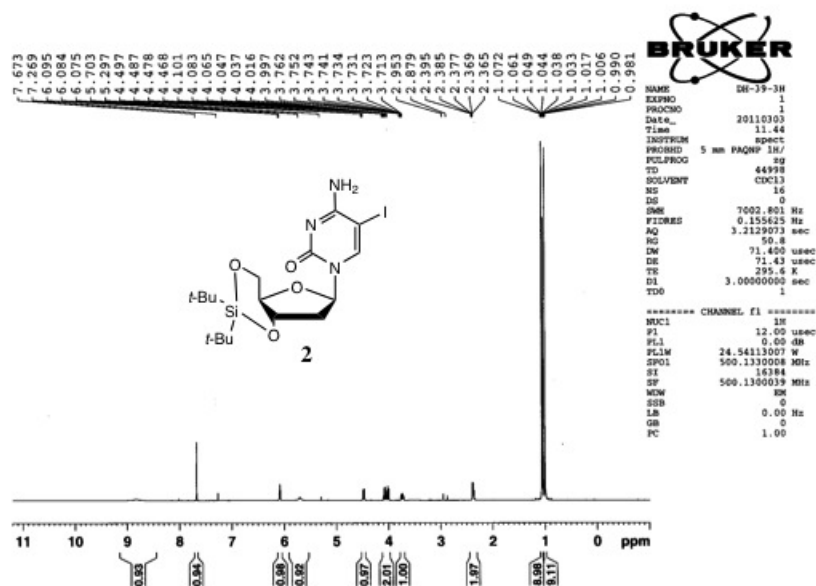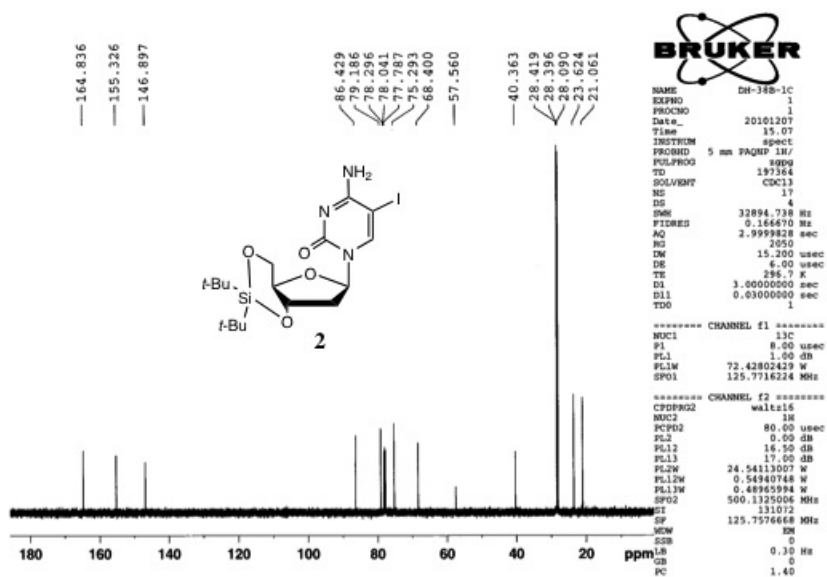

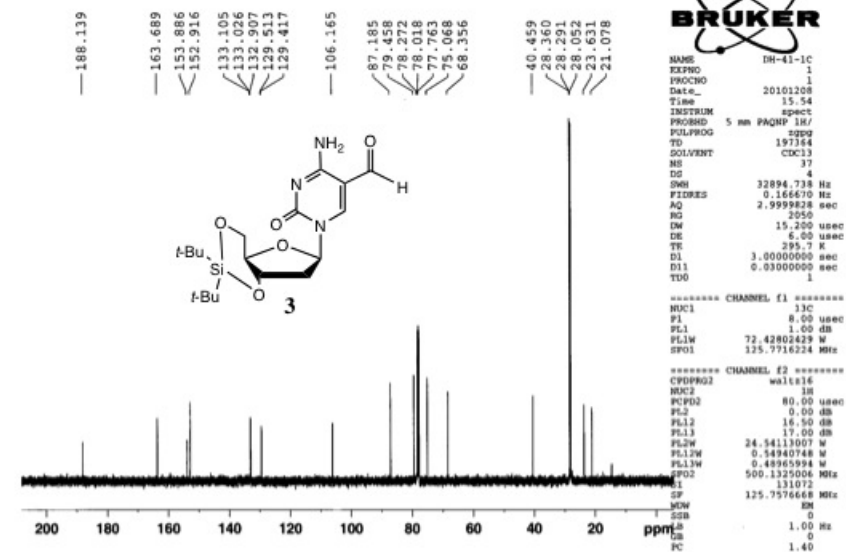

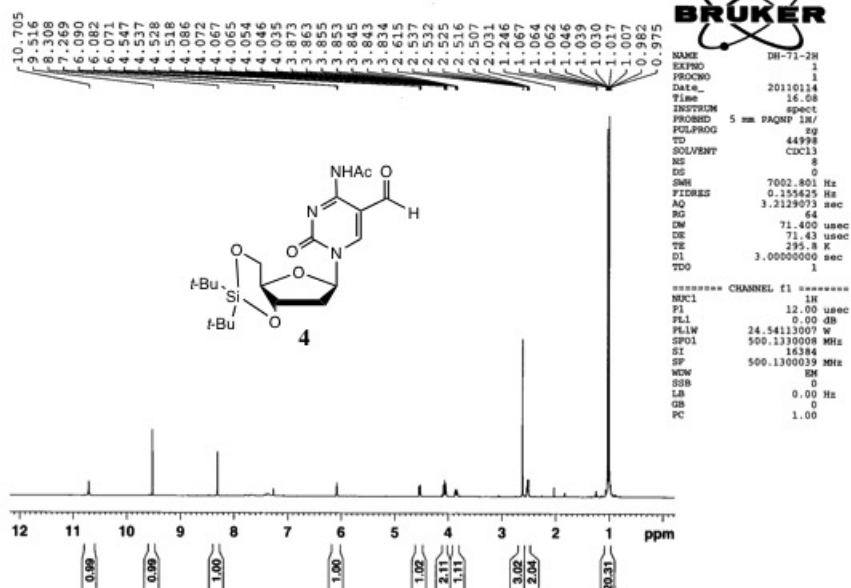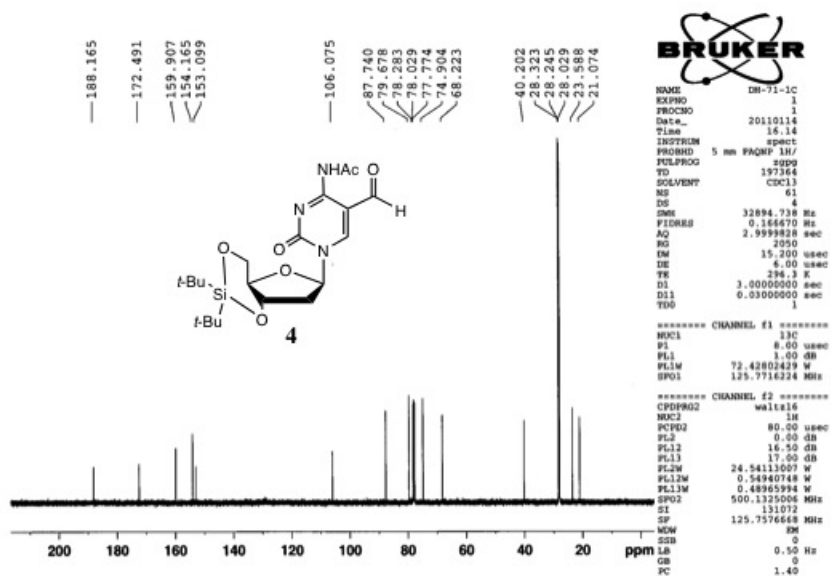

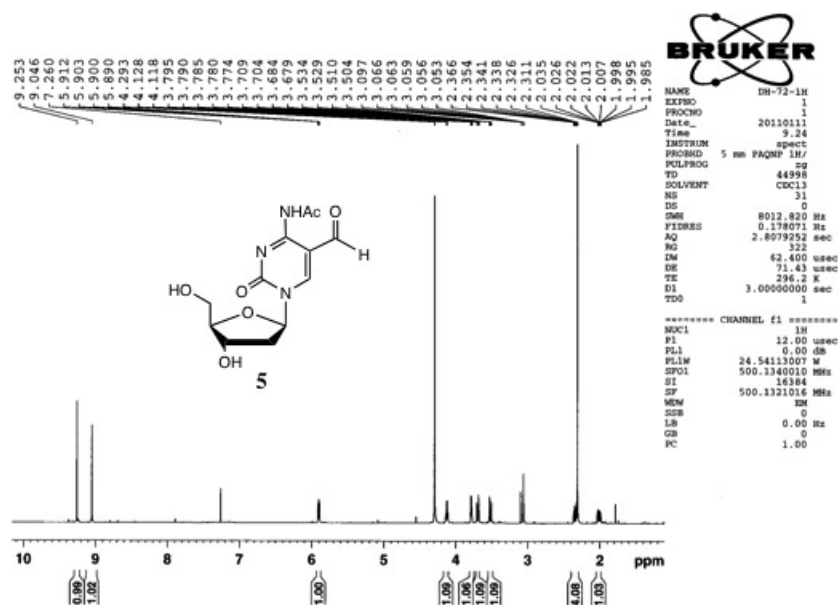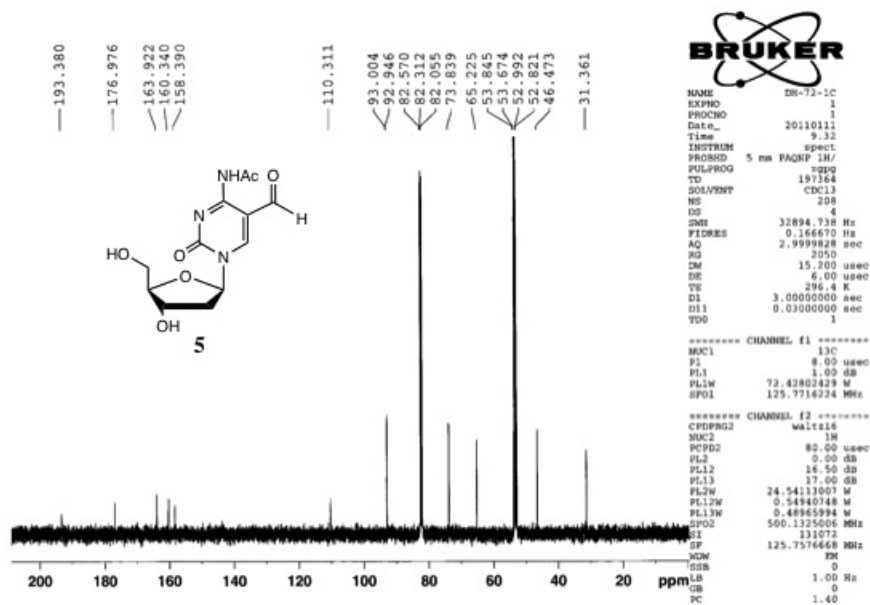

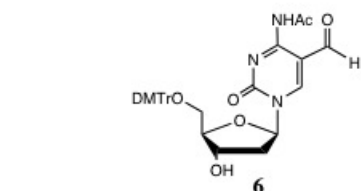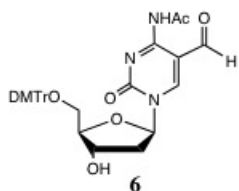

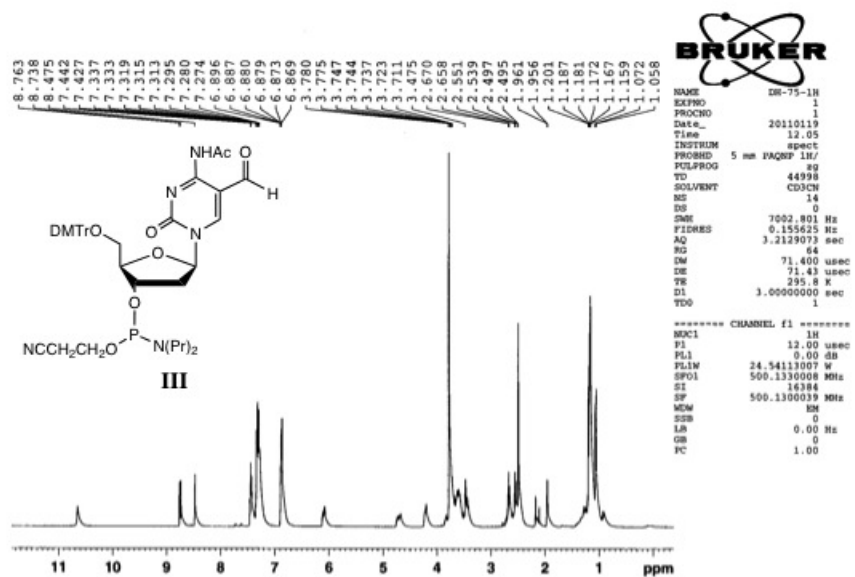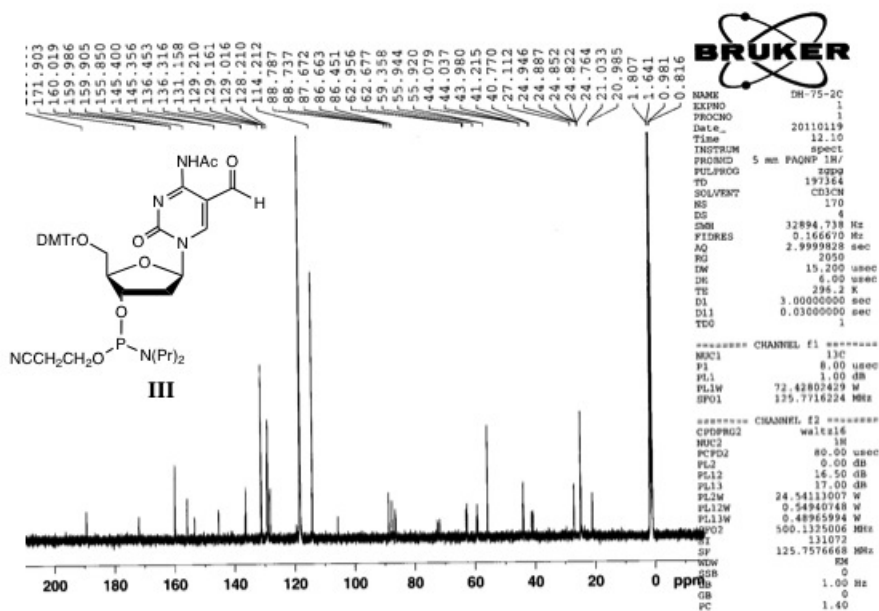

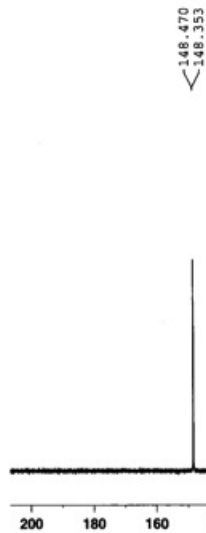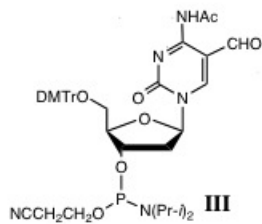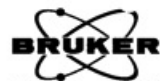

NAME DE-75-2P  
EXPNO 1  
PROCNO 1  
Date\_ 20110119  
Time 11.59  
INSTRUM spect  
PROBHD 5 mm PAQNP 1H/  
PULPROG zgpg  
TD 489122  
SOLVENT CDCl3  
NS 18  
DS 4  
SWH 81521.742 Hz  
FIDRES 0.166670 Hz  
AQ 2.9999981 sec  
RG 2890  
DM 6.133 usec  
DE 6.00 usec  
TE 296.2 K  
D1 3.0000000 sec  
D11 0.0300000 sec  
TD0 1

\*\*\*\*\* CHANNEL f1 \*\*\*\*\*  
NUC1 31P  
P1 11.00 usec  
PL1 3.00 dB  
PL1W 41.92221451 W  
SFO1 202.4763806 MHz

\*\*\*\*\* CHANNEL f2 \*\*\*\*\*  
CPDPRG2 waltz16  
NUC2 1H  
PCPD2 100.00 usec  
PL2 120.00 dB  
PL12 16.50 dB  
PL13 17.00 dB  
PL2W 0.00000000 W  
PL12W 0.54940748 W  
PL13W 0.48965994 W  
SFO2 500.1325000 MHz  
SI 32768  
SF 202.4563350 MHz  
WDW EM  
GB 0  
LB 0.00 Hz  
GB 0  
PC 1.40

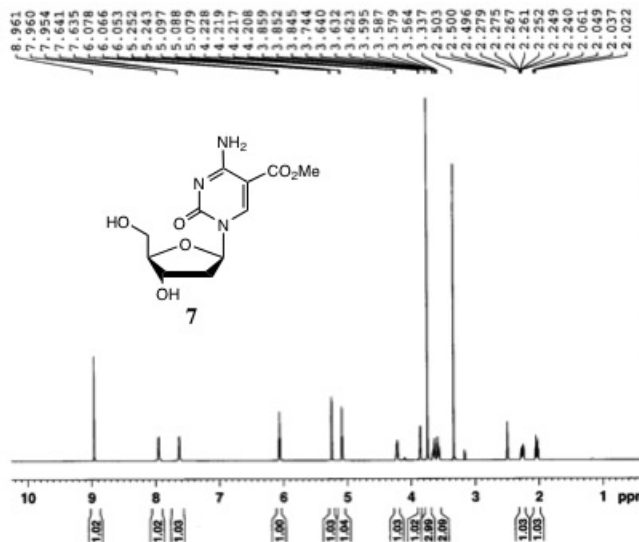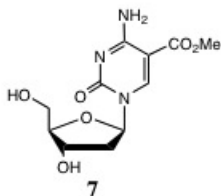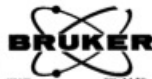

NAME DE-116B  
EXPNO 1  
PROCNO 1  
Date\_ 20110324  
Time 17.09  
INSTRUM spect  
PROBHD 5 mm PAQNP 1H/  
PULPROG zgpg  
TD 44998  
SOLVENT DMSO  
NS 13  
DS 0  
SWH 7002.401 Hz  
FIDRES 0.155425 Hz  
AQ 3.2129073 sec  
RG 161  
DM 71.400 usec  
DE 71.42 usec  
TE 295.7 K  
D1 3.0000000 sec  
TD0 1

\*\*\*\*\* CHANNEL f1 \*\*\*\*\*  
NUC1 1H  
P1 12.00 usec  
PL1 0.00 dB  
PL1W 34.54113007 W  
SFO1 500.1330008 MHz  
SI 16384  
SF 500.1300033 MHz  
WDW EM  
GB 0  
LB 0.00 Hz  
GB 0  
PC 1.00



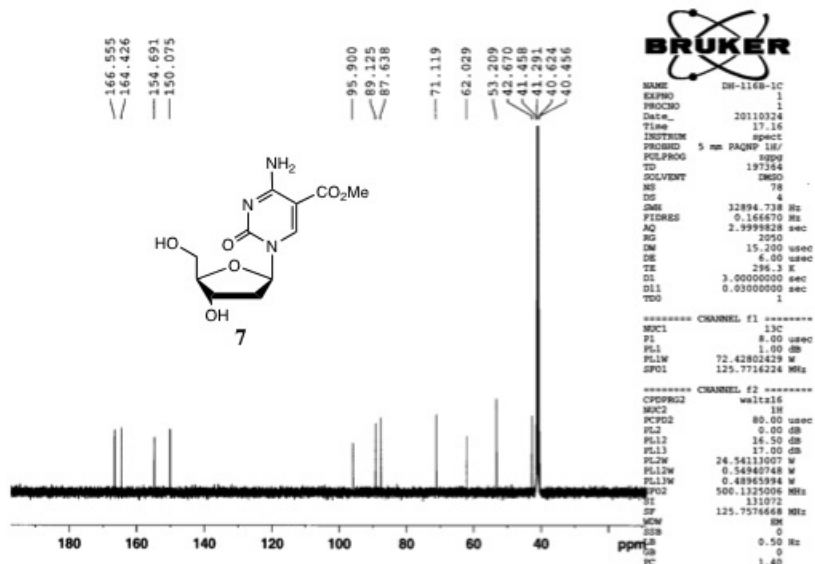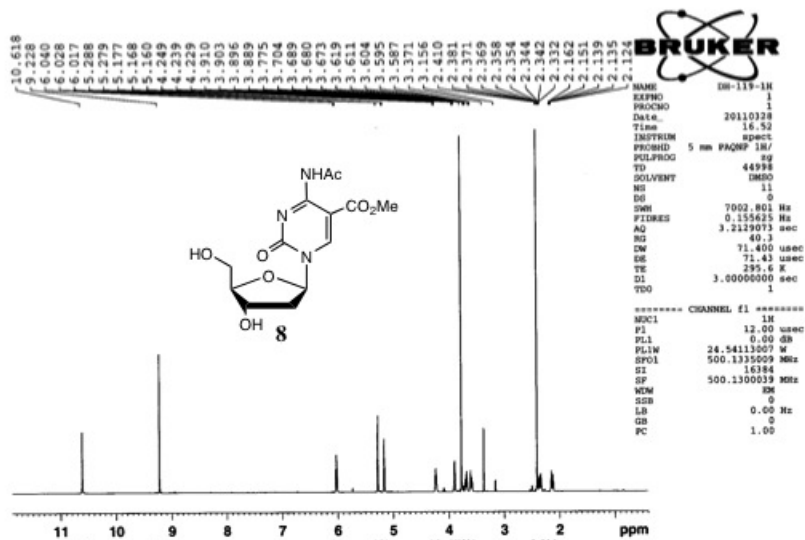

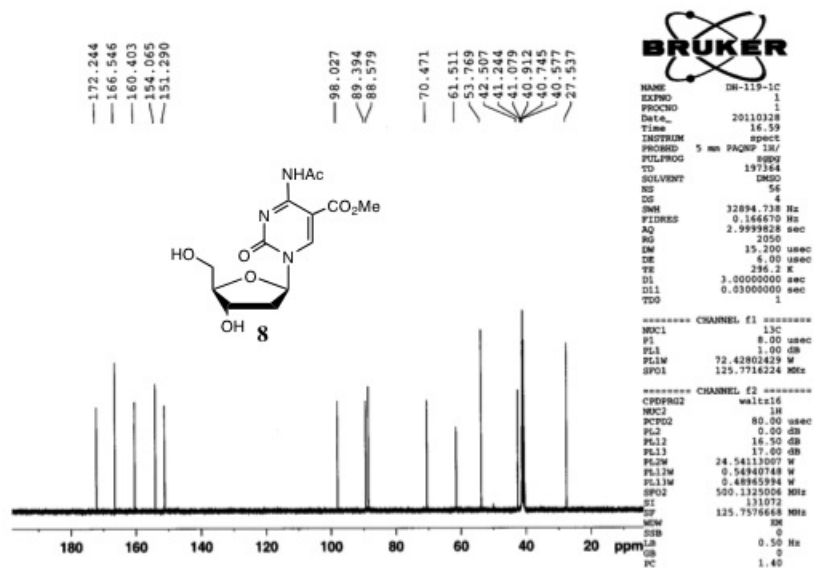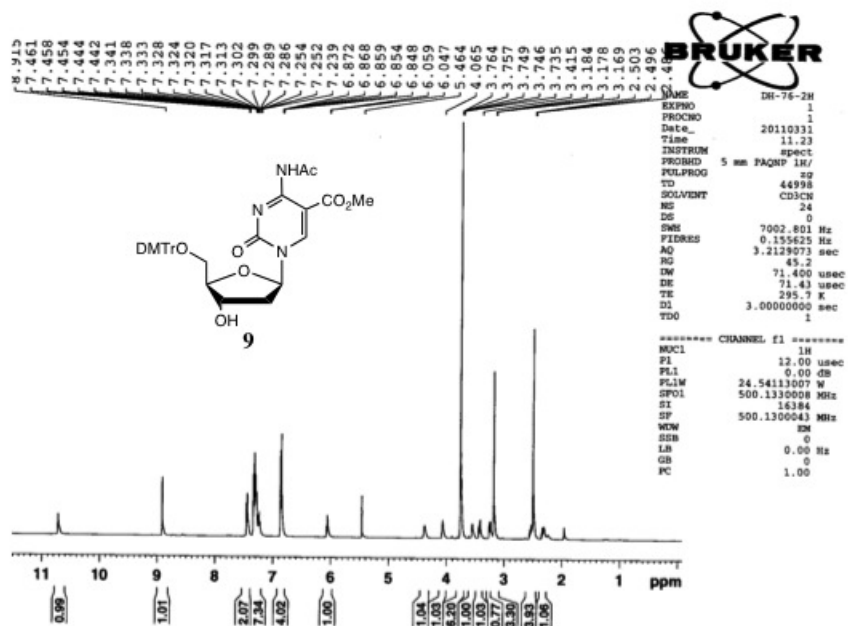

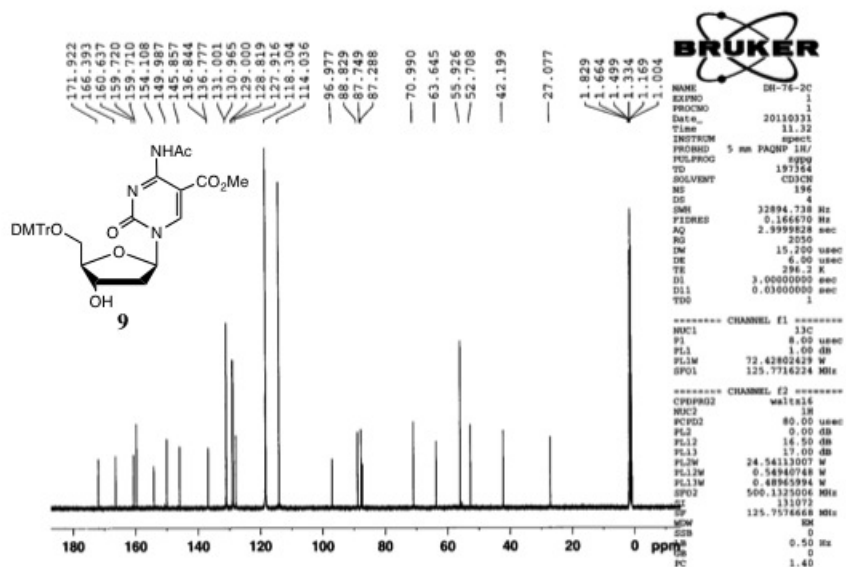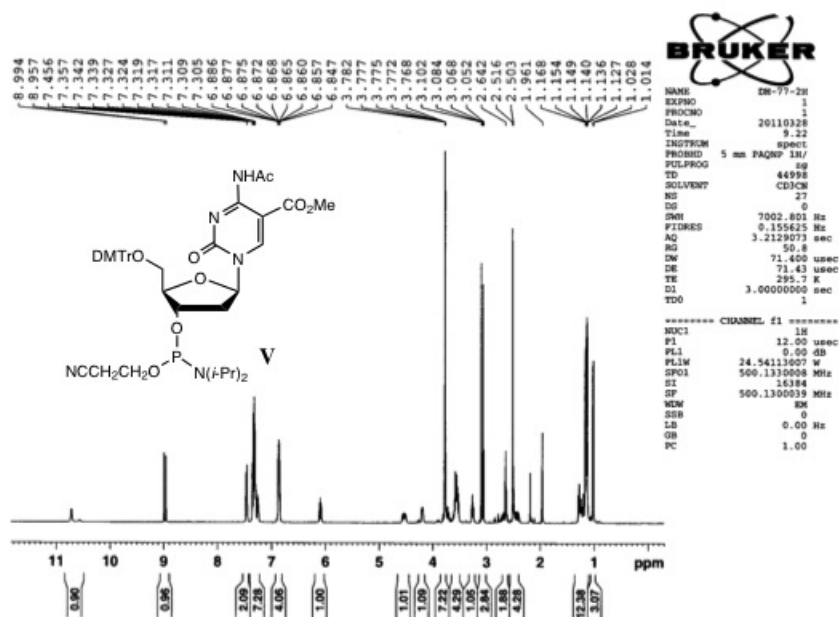

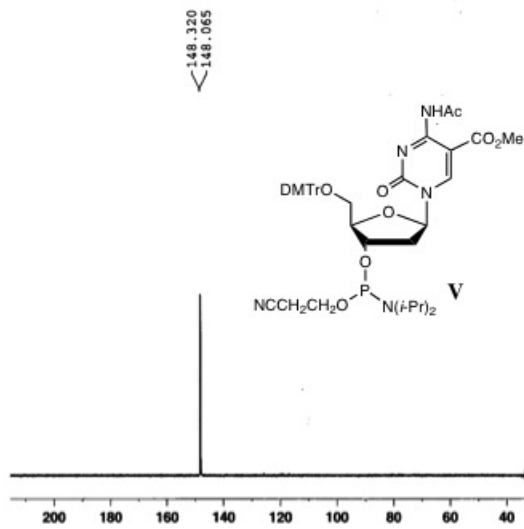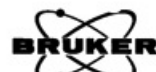

NAME DM-77-2P  
EXPNO 1  
PROCNO 1  
Date\_ 20110328  
Time 9.32  
INSTRUM spect  
PROBHD 5 mm PABP 1H/  
PULPROG zgpg  
TD 489132  
SOLVENT CDCl3  
NS 25  
DS 4  
SWH 81521.742 Hz  
FIDRES 0.166670 Hz  
AQ 2.999981 sec  
RG 2890  
DM 6.133 usec  
DE 6.00 usec  
TE 296.2 K  
D1 3.0000000 sec  
D11 0.0300000 sec  
TDO 1

\*\*\*\*\* CHANNEL f1 \*\*\*\*\*  
NUC1 13C  
P1 11.00 usec  
PL1 3.00 dB  
PL1W 41.9221451 W  
SFO1 202.4664578 MHz

\*\*\*\*\* CHANNEL f2 \*\*\*\*\*  
CPDPRG2 waltz16  
NUC2 1H  
PCPD2 100.00 usec  
PL2 120.00 dB  
PL12 16.50 dB  
PL13 17.00 dB  
PL2W 0.0000000 W  
PL12W 0.54940748 W  
PL13W 0.48965994 W  
SFO2 500.1325000 MHz  
ST 32768  
SF 202.4563350 MHz  
SW 8K  
GB 0.00 Hz  
GB 0  
PC 1.40

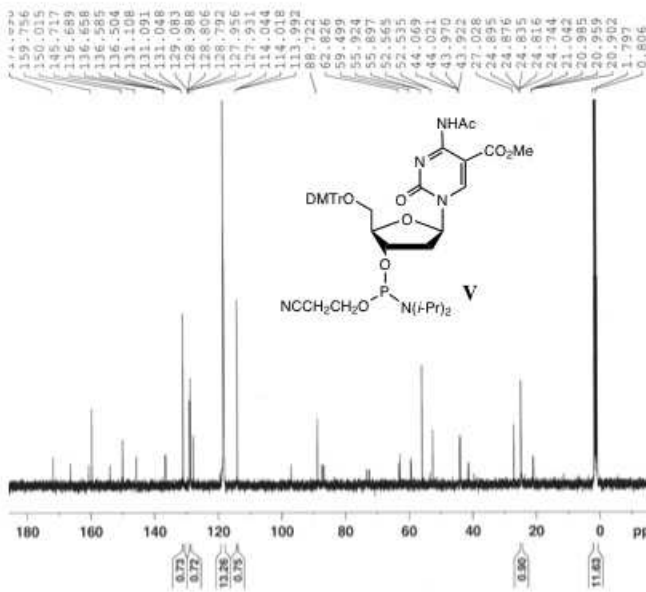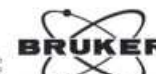

NAME DM-77-2C  
EXPNO 1  
PROCNO 1  
Date\_ 20110328  
Time 12.44  
INSTRUM spect  
PROBHD 5 mm PABP 1H/  
PULPROG zgpg  
TD 197364  
SOLVENT CDCl3  
NS 169  
DS 4  
SWH 32694.710 Hz  
FIDRES 0.166670 Hz  
AQ 2.9999828 sec  
RG 2050  
DM 15.200 usec  
DE 6.00 usec  
TE 296.3 K  
D1 3.0000000 sec  
D11 0.0300000 sec  
TDO 1

\*\*\*\*\* CHANNEL f1 \*\*\*\*\*  
NUC1 13C  
P1 8.00 usec  
PL1 1.00 dB  
PL1W 72.62803429 W  
SFO1 125.7718224 MHz

\*\*\*\*\* CHANNEL f2 \*\*\*\*\*  
CPDPRG2 waltz16  
NUC2 1H  
PCPD2 80.00 usec  
PL2 0.00 dB  
PL12 16.50 dB  
PL13 17.00 dB  
PL2W 24.94113067 W  
PL12W 0.54940748 W  
PL13W 0.48965994 W  
SFO2 500.1325004 MHz  
ST 131072  
SF 125.7578668 MHz  
SW 8K  
GB 0  
GB 1.00 Hz  
PC 1.40
